# Supplementary material for: Construction of a novel INHIBIT logic gate through a fine-tuned assembly of anthryl fluorophores via selective anion recognition and host–guest interactions
Source: Royal Society of Chemistry journal article supplement (doi:10.1039/c5ra20120a), 2015-12-18
Supplement: c5ra20120a1.pdf [file c5ra20120a1.pdf]

*Electronic Supplementary Information*

**Construction of a novel INHIBIT logic gate through fine-tuned assembly of anthryl fluorophore via selective anion recognition and host-guest interaction**

Lei Zhang <sup>a\*</sup>, Yilong He <sup>a</sup>, Na Zhang <sup>b</sup>, Daosheng Liu <sup>a</sup>, Jiao Han <sup>a</sup> and Weitao Gong <sup>c</sup>

<sup>a</sup>*College of Chemistry, Chemical Engineering and Environmental Engineering, Liaoning Shihua University, No.1 Dandong Road, Fushun 113001, Liaoning, China;*

<sup>b</sup>*Department of Chemical Engineering, Fushun Vocational Technology Institute, Fushun 113122, Liaoning, China;*

---

<sup>c</sup>*State Key Laboratory of Fine Chemicals, School of Chemical Engineering, School of Chemistry, Dalian University of Technology, Dalian 116024, P. R. China*

**\*Corresponding author: Lei Zhang, Email: [lnpuzhanglei@163.com](mailto:lnpuzhanglei@163.com)**

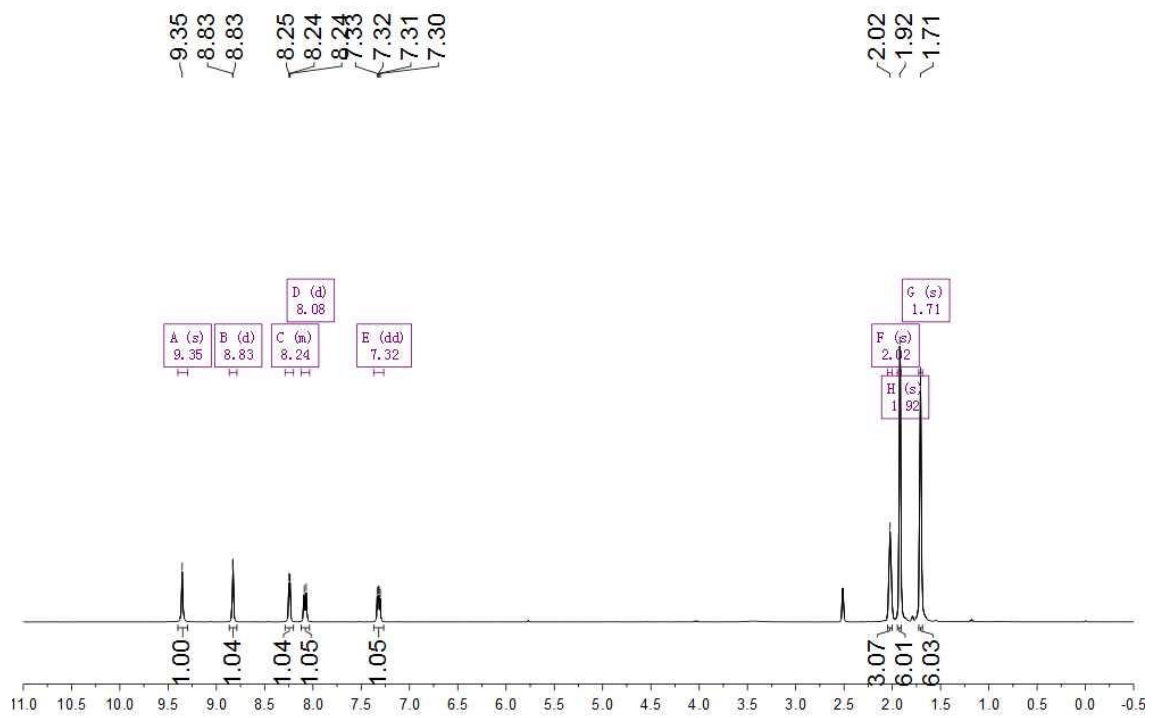

**Fig. S1**  $^1\text{H}$  NMR of N-(1-adamantoyl)-3-aminopyridine in  $\text{DMSO-d}_6$ .

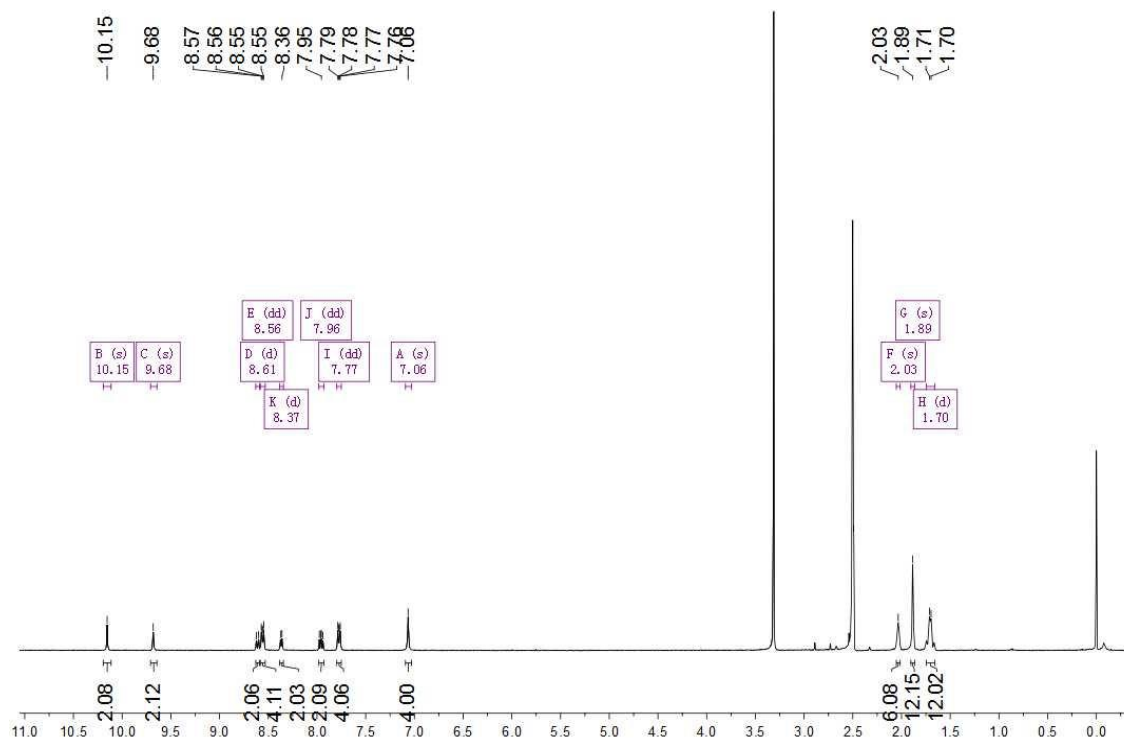

**Fig. S2**  $^1\text{H}$  NMR spectrum of AAP in  $\text{DMSO-d}_6$ .

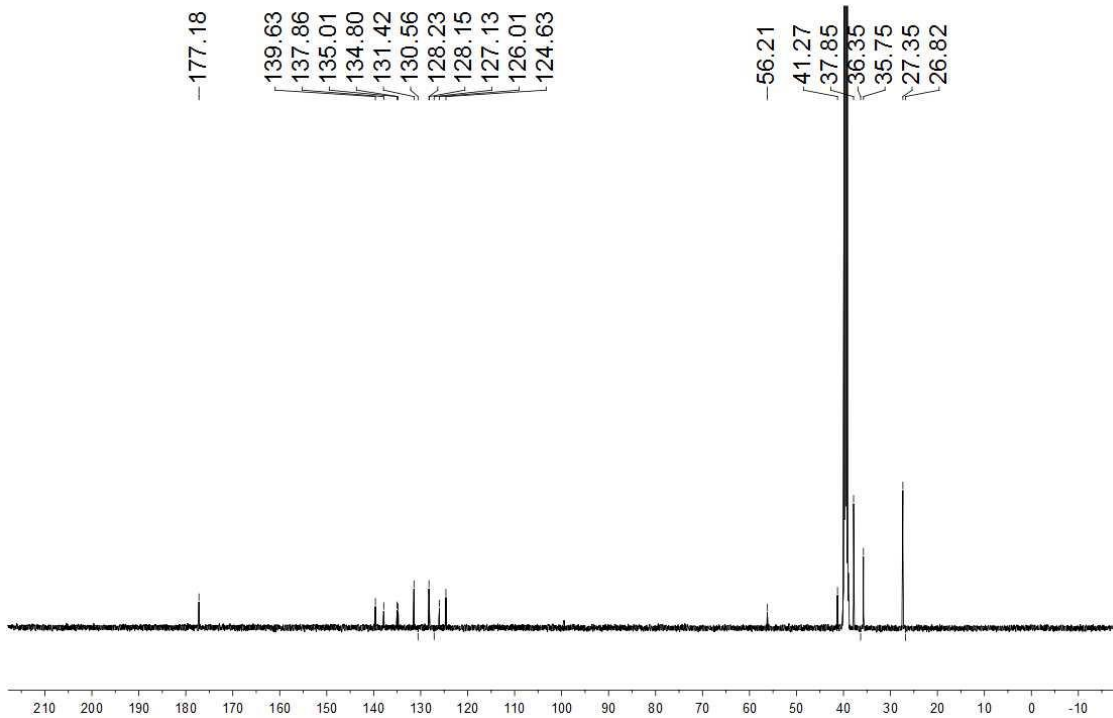

**Fig. S3**  $^{13}\text{C}$  NMR spectrum of AAP in DMSO- $d_6$ .

**ND**

14120305 34 (0.336) AM (Cen,2, 80.00, Ht,5000.0,0.00,1.00); Sm (Mn, 2x3.00); Cm (32:51) 4.79e3

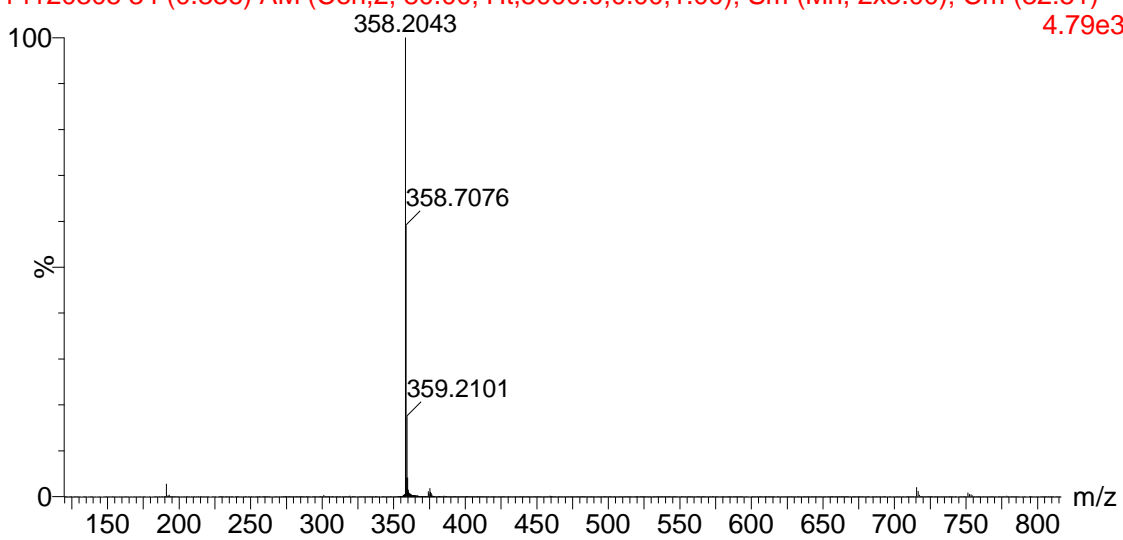

**Fig. S4** HRMS of AAP.

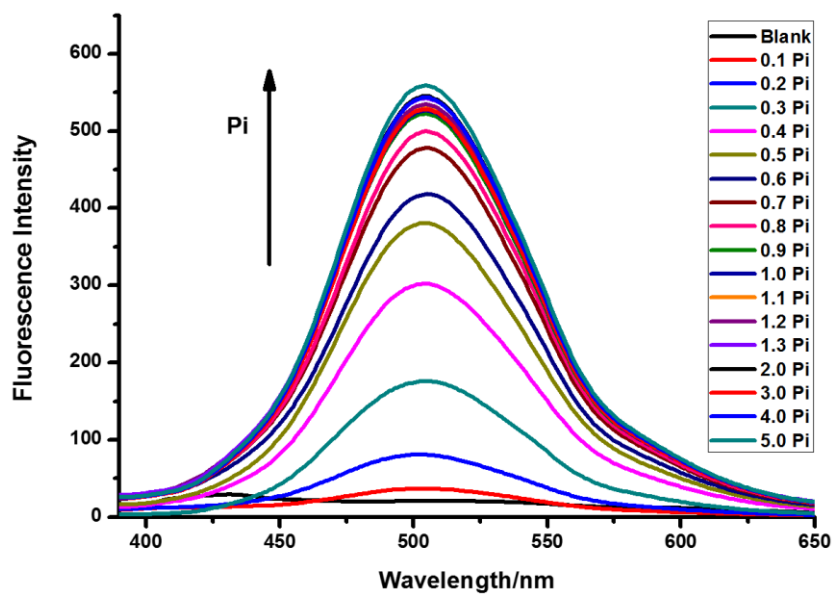

**Fig. S5** Fluorescence titration spectra of AAP (5  $\mu\text{M}$ ) upon addition of various amounts of Pi in  $\text{CH}_3\text{CN}$  ( $\lambda_{\text{ex}}=360 \text{ nm}$ )

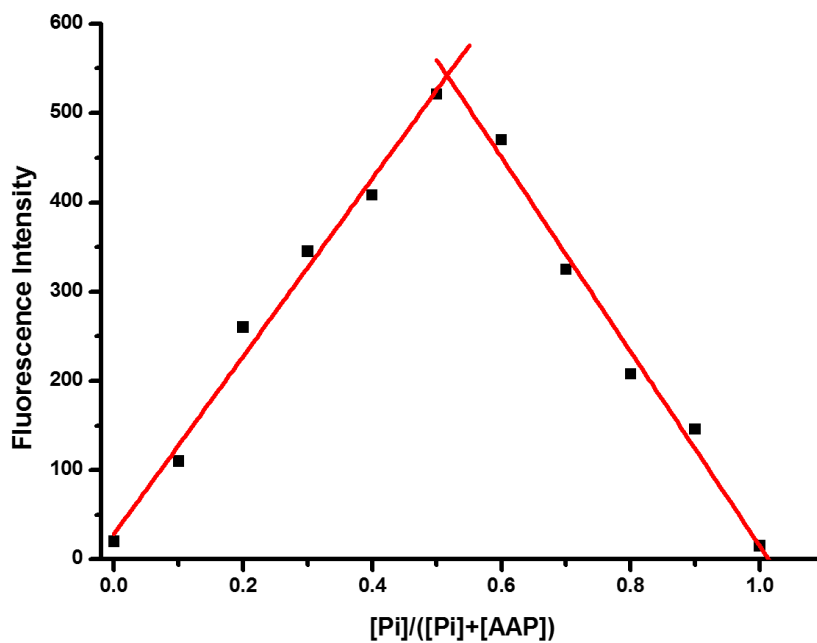

**Fig. S6** Job plot of emission intensity changes at 500 nm

**Binding Constant:** The Benesi-Hildebrand equation for 1:1 complex formation between host and guest molecule<sup>1</sup>:

$$\Delta F_{\max} / \Delta F = 1 + (1 / K_{\text{BH}} * [M])$$

Where

$K_{\text{BH}}$  is the binding constant of the complexation;

$[M]$  is the concentration of the variant ( Here in our case, it is the concentration of Pi);

A plot of  $\Delta F_{\max} / \Delta F$  vs.  $1/[M]$  will yield a straight line with slope  $1/K_{\text{BH}}$ . The inverse of slope is the binding constant.

**Detection Limit:** The detection limit was determined from the fluorescence titration data based on a reported method.<sup>2</sup> According to the result of titration experiment, the fluorescent intensity data at 500 nm were normalized between the minimum intensity and the maximum intensity. A plot of  $(I - I_{\min}) / (I_{\max} - I_{\min})$  vs.  $\log_{10}[M]$  will yield a straight line and the point at which this line crossed the X axis was considered as the detection limit.

#### References:

1. K. A. Connors, Binding Constants, *The Measurement of Molecular Complex Stability*; Wiley: New York, 1987.
2. W. T. Gong, B. Gao, J. Z. Zhao and G. L. Ning, *J. Mater. Chem. A*. 2003, **1**, 5501-5504.
